# Supplementary material for: Computational mass spectrometry accelerates C=C position-resolved untargeted lipidomics using oxygen attachment dissociation
Source: Research Square preprint supplement (doi:10.21203/rs.3.rs-727852/v1), 2021-07-26
Supplement: Supplementary file 1 [file 03a1e6e36f8172e093cf0bc4.docx]

**Supplementary Information**

**Computational mass spectrometry facilitates C=C position-resolved untargeted lipidomics using oxygen attachment dissociation**

Haruki Uchino1, 2, Hiroshi Tsugawa2, 3, 4, 5,*, Hidenori Takahashi6, Makoto Arita1, 2, 4,*

**Affiliations**

1. Division of Physiological Chemistry and Metabolism, Graduate School of Pharmaceutical Sciences, Keio University, 1-5-30 Shibakoen, Minato-ku, Tokyo 105-8512, Japan
2. Laboratory for Metabolomics, RIKEN Center for Integrative Medical Sciences, 1-7-22 Suehiro-cho, Tsurumi-ku, Yokohama, Kanagawa 230-0045, Japan
3. RIKEN Center for Sustainable Resource Science, 1-7-22 Suehiro-cho, Tsurumi-ku, Yokohama, Kanagawa 230-0045, Japan
4. Cellular and Molecular Epigenetics Laboratory, Graduate School of Medical life Science, Yokohama City University, Tsurumi-ku, Yokohama, Kanagawa 230-0045, Japan
5. Department of Biotechnology and Life Science, Tokyo University of Agriculture and Technology, 2-24-16 Nakamachi, Koganei-shi, Tokyo 184-8588, Japan
6. Koichi Tanaka Mass Spectrometry Research Laboratory, Shimadzu Corporation, 1 Nishinokyo-Kuwabaracho Nakagyo-ku, Kyoto 604-8511, Japan

**Contents:**

Supplementary Figures 1-7

Supplementary Tables 1-8

**Supplementary Figures**

**Supplementary Figure 1a.** The oxygen attachment dissociation coupled to tandem mass spectrometry (**OAD-MS/MS) spectra of diacylglycerophosphocholine.** The theoretical *m/z* values of essential product ions are described along with the chemical structure, while the experimental *m/z* values are shown in the line chart of the MS/MS spectrum. In the reversible spectral charts, the top and bottom panels show the experimental and reference MS/MS spectra, respectively.

**Supplementary Figure 1b. OAD-MS/MS spectra of glycerophospholipids.** The theoretical *m/z* values of essential product ions are described along with the chemical structure, while the experimental *m/z* values are shown in the line chart of the MS/MS spectrum. In the reversible spectral charts, the top and bottom panels show the experimental and reference MS/MS spectra, respectively.

**Supplementary Figure 1c. OAD-MS/MS spectra of monoacyl glycerophospholipids and sphingolipids.** The theoretical *m/z* values of essential product ions are described along with the chemical structure, while the experimental *m/z* values are shown in the line chart of the MS/MS spectrum. In the reversible spectral charts, the top and bottom panels show the experimental and reference MS/MS spectra, respectively.

**Supplementary Figure 1d. OAD-MS/MS spectra of glycerolipids and fatty acids** The theoretical *m/z* values of essential product ions are described along with the chemical structure, while the experimental *m/z* values are shown in the line chart of the MS/MS spectrum. In the reversible spectral charts, the top and bottom panels show the experimental and reference MS/MS spectra, respectively.

**Supplementary Figure 2.** **Fragmentation patterns of OAD.** The fragmentations were driven by atomic oxygen and hydroxyl radicals. Fragmentation types, such as the “OAD03,” are assigned to each pattern, which is corresponding to **Supplementary Table 2**. All radicals, including hydroxyl radicals, hydrogen radicals, and atomic oxygen, are generated by the microwave discharge of H2O vapor1.

**Supplementary Figure 3.** **Analysis of the lipid extract from HEK293 cells fed with the polyunsaturated fatty acid (PUFA)-rich media.** Extracted ion chromatography of *m/z* 778.54 of PC 36:6 and the corresponding CID-MS/MS and OAD-MS/MS obtained from the samples fed with (**a)** no PUFA, (**b)** docosahexaenoic acid (DHA), (**c)** eicosapentaenoic acid (EPA), (**d)** alpha-linoleic acid (α-LA), (**e)** γ-LA, and (**f)** α-LA and γ-LA respectively were shown in each part. The CID-MS/MS and OAD-MS/MS spectra were annotated by the MS-DIAL and mass spectrometry radical-induced dissociation decipherer (MS-RIDD) programs. In the reversible spectral charts of OAD-MS/MS, the top and bottom panels show the experimental and reference MS/MS spectra, respectively. The detailed behavior of CID- and OAD-MS/MS spectra with co-eluents in a time series along the data acquisition time is displayed in each sample. The co-eluents of acyl chain isomers, i.e., PC 16:1_20:5 and 18:3_18:3(**d-ii, e-ii, f-iii)**, and PC 14:0_22:6 and 18:3_18:3(**e-iii, f-iv)**, are determined by the fragment ion evidence in CID-MS/MS. The ambiguous annotations caused by the co-eluents are also displayed.

**Supplementary Figure 4. Lipid subclasses annotated in the C=C position-resolved untargeted lipidomics of biological samples.** R.T. and m/z values of unique 675 lipids from 22 lipid subclasses resolved at the C=C positional isomers level are plotted. The abbreviations of lipid subclasses are as follows: AHexCer, acylhexosylceramide; CAR, acylcarnitine; Cer_AP, ceramide alpha-hydroxy fatty acid-phytospingosine; Cer_EOS, ceramide esterified omega-hydroxy fatty acid-sphingosine; Cer_HS, ceramide hydroxy fatty acid-sphingosine; Cer_NS, ceramide non-hydroxyfatty acid-sphingosine; DG, diacylglycerol; EtherLPC, alkylacyl LPC; EtherPC, alkylacyl PC; EtherPE, alkylacyl PE; HexCer_HS, hexosylceramide hydroxyfatty acid-sphingosine; HexCer_NS, hexosylceramide non-hydroxyfatty acid-sphingosine; LPC, lysophosphatidylcholine; LPE, lysophosphatidylethanolamine; NAE, N-acyl ethanolamine; PC, phosphatidylcholine; PE, phosphatidylethanolamine; PlasmPC, plasmenyl PC; PlasmPE, plasmenyl PE; PS, phosphatidylserine; SM, sphingomyelin; TG, triacylglycerol; VLC-PUFA PC and SM, PC and SM containing very long chain poly unsaturated fatty acyl.

**Supplementary Figure 5. The C=C position-defined lipidome of mammalian tissues.** Hierarchical clustering analysis of (a) phospholipids and (b) other lipid categories using the data matrix of lipid moieties counts. The count in each tissue was scaled from 0 to 1 by dividing with maximum count. Characteristic C=C isomer moieties are displayed with blue letters and commonly detected moieties are displayed in black letters. C=C isomer moiety in heatmap labels is displayed with a prefix (*/) or a suffix (/* or _*). The prefix, e.g. Cer_NS */24:1 n9 and PlasmPE */20:4 n6, means that the former moiety is *N*-acyl chain and the latter is *sn*-2 acyl chain. The suffix (/*) means that a moiety is sphingoid base or *O*-/*P*- acyl chain: e.g. SM d18:1 *Δ*4/* and PlasmPE *P*-18:0/*, respectively. Another suffix (_*) means that a moiety is ether *sn*-1, -2 or -3: e.g. PC 18:1 n9_* and TG 16:1 n7_*. The data were potentially quantitative, but no detection does not prove the nonexistence of certain lipid moieties because of technical limitations.

**Supplementary Figure 6.** **CID- & OAD-MS/MS spectra of notable C=C isomers detected in biological samples.** The CID- and OAD-MS/MS spectra of characteristic C=C isomers in each biological tissue (**Supplementary Figure 5)** are summarized. Diagnostic fragment ions that define lipid species levels (lipid subclass and acyl chains) are described in the experimental *m/z* values of the CID-MS/MS spectra. The theoretical *m/z* values of the essential product ions of OAD-MS/MS are described along with the chemical structure, while the experimental *m/z* values are shown in the line chart of the OAD-MS/MS spectrum. In the reversible spectral charts, the top and bottom panels show the experimental and reference MS/MS spectra, respectively.The position of *the O-*acyl chain in AHexCer is not defined (mouse brain).

**Supplementary Figure 7.** **The decision tree algorithm of C=C positional annotation in the MS-RIDD program.** The process differs in case of (**a**) the target lipid containing ester-bond acyl chains only, (**b**) target containing ether-linkage, and (**c**) the target lipid being sphingolipids. In (**b**) the fragment ions of plasmalogen, e.g., NLs of 208.2555 Da and 209.2633 Da in case of *P*-18:0, are checked before the following process. The main procedure contains the following steps. First, MS-RIDD generates theoretically possible structural candidates based on the lipid molecular species information, and computes the reference neutral loss list, i.e., in silico tandem mass spectrum, according to the dissociation rules (**Supplementary Table 2**). Next, the software evaluates the essential diagnostic ions, fragment ions of OAD03 and OAD16, in each C=C location; in case of sphingolipids OAD07 and OAD19 are also utilized as essential diagnostic ions. If a candidate is **4 location of sphingoid base, the software checks whether more than two ions of OAD15/16/17 or OAD18/19/20 exist. The mass tolerance in this checking is set within 15 ppm based on the *m/z* value of the precursor ion. Then the software calculates the MS/MS spectral similarity by reverse dot-product values using square-root transformed of intensity to prioritize structure candidates. Annotation result differs by the situation of the remaining candidates. Taking TG 18:1_18:1_18:3 as an example, if no candidate remains in each moiety, the annotation result sets as TG 18:1_18:1_18:3 (not resolved level). If more than one candidate remains, the highest candidate is adapted. In this case, the annotation sets as TG 18:1(n-7)_18:1(n-9)_18:3 (partially resolved level) or TG 18:1(n-7)_18:1(n-9)_18:3(n-3,6,9) (all resolved level); if same moieties (two moieties of C18:1) exist, the second highest candidate (n-7) is assigned as well, where the result can be change in the graphical use interface.

**Supplementary Table 1.** The authentic lipid standards used in this study are displayed here. The lipid classification system includes category, class, and subclass according to the LIPID MAPS definition, and the metabolite names are represented by a shorthand notation system2. According to the main text, the C=C positions in the acyl chain are written by the n-description, and those in sphingoid bases are written by the delta-description.

**Supplementary Table 2.** Details of the dissociation patterns of OAD. The value of x within the composition formula in the “Formula (Neutral loss)” column is equal to the C=C position; in case of n-9, the value of x is equal to 9. O-1 in the “Formula (Neutral loss)” column indicates the attachment of an oxygen atom. The types of OAD-18, 19, and 20 are utilized only in the annotations of sphingolipids. The column of “Ratio (%)” shows the reference values of relative intensity in the MS/MS spectra.

**Supplementary Table 3.** Lipid standards of polyunsaturated fatty acids utilized in the HEK cell experiments.

**Supplementary Table 4.** Experimental conditions and cell counts of the HEK samples.

**Supplementary Table 5.** Fragment query setting in MS-DIAL

**Supplementary Table 6.** Annotation numbers in the C=C position resolved the untargeted lipidomics. The column of “Only saturated” shows the annotation numbers of lipid species containing saturated acyl chains, such as PC 16:0_18:0. OAD-MS/MS was performed in positive ion mode.

**Supplementary Table 7.** Lipid extraction design and injection volume of HEK cell samples.

**Supplementary Table 8.** The lipid extraction design and injection volume of biological samples.

**Supplementary References**

1. Takahashi, H. *et al.* Structural Analysis of Phospholipid Using Hydrogen Abstraction Dissociation and Oxygen Attachment Dissociation in Tandem Mass Spectrometry. *Anal. Chem.* **90**, 7230–7238 (2018).

2. Liebisch, G. *et al.* Update on LIPID MAPS classification, nomenclature, and shorthand notation for MS-derived lipid structures. *J. Lipid Res.* **61**, 1539–1555 (2020).
