# Supplementary material for: Computational mass spectrometry accelerates C=C position-resolved untargeted lipidomics using oxygen attachment dissociation
Source: Research Square preprint supplement (doi:10.21203/rs.3.rs-727852/v1), 2021-07-26
Supplement: Supplementary file 2 [file 757a9458cdfc2024942efb1f.xlsx]

## Sheet: TableS01
Authentic lipid standards : Total 31 including 21 lipid subclasses
Category	Class	Subclass	Metabolite name
Fatty Acyls [FA]	Fatty esters [FA07]	Fatty acyl carnitines [FA0707]	CAR 18:1(n-9)
Glycerolipids [GL]	Diradylglycerols [GL02]	Diacylglycerols [GL0201]	DG 18:1(n-9)/18:1(n-9)
Glycerolipids [GL]	Triradylglycerols [GL03]	Triacylglycerols [GL0301]	TG 18:1(n-9)/18:1(n-9)/18:1(n-9)
Glycerophospholipids [GP]	Glycerophosphates [GP10]	Diacylglycerophosphates [GP1001]	PA 18:1(n-9)/18:1(n-9)
Glycerophospholipids [GP]	Glycerophosphocholines [GP01]	Diacylglycerophosphocholines [GP0101]	PC 14:1(n-5)/14:1(n-5)
Glycerophospholipids [GP]	Glycerophosphocholines [GP01]	Diacylglycerophosphocholines [GP0101]	PC 16:1(n-7)/16:1(n-7)
Glycerophospholipids [GP]	Glycerophosphocholines [GP01]	Diacylglycerophosphocholines [GP0101]	PC 18:1(n-9)/16:0
Glycerophospholipids [GP]	Glycerophosphocholines [GP01]	Diacylglycerophosphocholines [GP0101]	PC 18:0/18:1(n-9)
Glycerophospholipids [GP]	Glycerophosphocholines [GP01]	Diacylglycerophosphocholines [GP0101]	PC 18:1(n-9)/18:1(n-9)
Glycerophospholipids [GP]	Glycerophosphocholines [GP01]	Diacylglycerophosphocholines [GP0101]	PC 18:3(n-3,6,9)/18:3(n-3,6,9)
Glycerophospholipids [GP]	Glycerophosphocholines [GP01]	Diacylglycerophosphocholines [GP0101]	PC 16:0/20:4(n-6,9,12,15)
Glycerophospholipids [GP]	Glycerophosphocholines [GP01]	1-alkyl,2-acylglycerophosphocholines [GP0102]	PC O-16:0/18:1(n-9)
Glycerophospholipids [GP]	Glycerophosphocholines [GP01]	1-(1Z-alkenyl),2-acylglycerophosphocholines [GP0103]	PC P-18:0/18:1(n-9)
Glycerophospholipids [GP]	Glycerophosphocholines [GP01]	Monoacylglycerophosphocholines [GP0105]	LPC 18:1(n-9)
Glycerophospholipids [GP]	Glycerophosphoethanolamines [GP02]	Diacylglycerophosphoethanolamines [GP0201]	PE 18:1(n-9)/18:1(n-9)
Glycerophospholipids [GP]	Glycerophosphoethanolamines [GP02]	Diacylglycerophosphoethanolamines [GP0201]	PE N-(FA 20:4(n-6,9,12,15)) 18:1(n-9)/18:1(n-9)
Glycerophospholipids [GP]	Glycerophosphoethanolamines [GP02]	1-alkyl,2-acylglycerophosphoethanolamines [GP0202]	PE O-16:0/18:1(n-9)
Glycerophospholipids [GP]	Glycerophosphoethanolamines [GP02]	1-(1Z-alkenyl),2-acylglycerophosphoethanolamines [GP0203]	PE P-18:0/18:1(n-9)
Glycerophospholipids [GP]	Glycerophosphoethanolamines [GP02]	Monoacylglycerophosphoethanolamines [GP0205]	LPE 18:1(n-9)
Glycerophospholipids [GP]	Glycerophosphoserines [GP03]	Diacylglycerophosphoserines [GP0301]	PS 18:1(n-9)/18:1(n-9)
Glycerophospholipids [GP]	Glycerophosphoserines [GP03]	Monoacylglycerophosphoserines [GP0305]	LPS 18:1(n-9)
Glycerophospholipids [GP]	Glycerophosphoglycerols [GP04]	Diacylglycerophosphoglycerols [GP0401]	PG 18:1(n-9)/18:1(n-9)
Glycerophospholipids [GP]	Glycerophosphoglycerols [GP04]	Diacylglycerophosphoglycerols [GP0401]	PG 22:6(n-3,6,9,12,15,18)/22:6(n-3,6,9,12,15,18)
Glycerophospholipids [GP]	Glycerophosphoglycerols [GP04]	Monoacylglycerophosphoglycerols [GP0405]	LPG 18:1(n-9)
Glycerophospholipids [GP]	Glycerophosphoglycerols [GP04]	Diacylglycerophosphomonoradylglycerols [GP0409]	HBMP 18:1(n-9)/18:1(n-9)/18:1(n-9)
Glycerophospholipids [GP]	Glycerophosphoinositols [GP06]	Diacylglycerophosphoinositols [GP0601]	PI 18:0/20:4(n-6,9,12,15)
Glycerophospholipids [GP]	Glycerophosphoinositols [GP06]	Monoacylglycerophosphoinositols [GP0605]	LPI 18:1(n-9)
Sphingolipids [SP]	Ceramides [SP02]	N-acylsphingosines [SP0201]	Cer 18:2(4E, 8Z);2O/24:1(n-9)
Sphingolipids [SP]	Ceramides [SP02]	N-acylsphingosines [SP0201]	Cer 18:1(4E);2O/18:1(n-9)
Sphingolipids [SP]	Ceramides [SP02]	N-acylsphingosines [SP0201]	Cer 18:2(4E, 8Z);2O/24:0
Sphingolipids [SP]	Phosphosphingolipids [SP03]	Ceramie phosphocholines (sphingomyelins) [SP0301]	SM 18:1(4E);2O/18:1(d9)(n-9)

## Sheet: TableS02
Dissociation patterns of OAD
				Neutral loss values
Type	Dissociation position	Formula (Neutral loss)	Ratio(%)	n-3	n-4	n-5	n-6	n-7	n-8	n-9	n-10	n-11	n-12	n-13	n-14	n-15	n-16	n-17
OAD01	Methyl end side	Cx-1H2x-3O-1	0.1	11.0286	25.0442	39.0599	53.0755	67.0912	81.1068	95.1225	109.138	123.154	137.169	151.185	165.201	179.216	193.232	207.248
OAD02	Methyl end side	Cx-1H2x-2O-1	0.25	12.0364	26.052	40.0677	54.0833	68.099	82.1146	96.1303	110.146	124.162	138.177	152.193	166.209	180.224	194.24	208.255
OAD03	Methyl end side	Cx-1H2x-1O-1	0.5	13.0442	27.0599	41.0755	55.0912	69.1068	83.1225	97.1381	111.154	125.169	139.185	153.201	167.216	181.232	195.248	209.263
OAD04	Methyl end side	Cx-1H2xO-1	0.01	14.052	28.0677	42.0833	56.099	70.1146	84.1303	98.1459	112.162	126.177	140.193	154.209	168.224	182.24	196.255	210.271
OAD05	Methyl end side	OAD01 + H2O	0.01	29.0391	43.0548	57.0704	71.0861	85.1017	99.1174	113.133	127.149	141.164	155.18	169.196	183.211	197.227	211.243	225.258
OAD06	Methyl end side	OAD02 + H2O	0.05	30.047	44.0626	58.0783	72.0939	86.1095	100.125	114.141	128.156	142.172	156.188	170.203	184.219	198.235	212.25	226.266
OAD07	Methyl end side	OAD03 + H2O	0.1	31.0548	45.0704	59.0861	73.1017	87.1174	101.133	115.149	129.164	143.18	157.196	171.211	185.227	199.243	213.258	227.274
OAD08	C=C position	CxH2xO-1	0.06	26.052	40.0677	54.0833	68.099	82.1146	96.1303	110.146	124.162	138.177	152.193	166.209	180.224	194.24	208.255	222.271
OAD09	C=C position	CxH2x-2	0.06	40.0313	54.047	68.0626	82.0782	96.0939	110.11	124.125	138.141	152.156	166.172	180.188	194.203	208.219	222.235	236.25
OAD10	C=C position	CxH2x-1	0.1	41.0391	55.0548	69.0704	83.0861	97.1017	111.117	125.133	139.149	153.164	167.18	181.196	195.211	209.227	223.243	237.258
OAD11	C=C position	CxH2x	0.02	42.047	56.0626	70.0782	84.0939	98.1095	112.125	126.141	140.156	154.172	168.188	182.203	196.219	210.235	224.25	238.266
OAD12	Ester-bond side	Cx+1H2x+1O-1	0.02	39.0599	53.0755	67.0912	81.1068	95.1225	109.138	123.154	137.169	151.185	165.201	179.216	193.232	207.248	221.263	235.279
OAD13	Ester-bond side	Cx+1H2x+2O-1	0.04	40.0677	54.0833	68.099	82.1146	96.1303	110.146	124.162	138.177	152.193	166.209	180.224	194.24	208.255	222.271	236.287
OAD14	Ester-bond side	Cx+1H2x-1	0.05	53.0391	67.0548	81.0704	95.0861	109.102	123.117	137.133	151.149	165.164	179.18	193.196	207.211	221.227	235.243	249.258
OAD15	Ester-bond side	Cx+1H2x	0.2	54.047	68.0626	82.0782	96.0939	110.11	124.125	138.141	152.156	166.172	180.188	194.203	208.219	222.235	236.25	250.266
OAD16	Ester-bond side	Cx+1H2x+1	0.4	55.0548	69.0704	83.0861	97.1017	111.117	125.133	139.149	153.164	167.18	181.196	195.211	209.227	223.243	237.258	251.274
OAD17	Ester-bond side	Cx+1H2x+2	0.03	56.0626	70.0782	84.0939	98.1095	112.125	126.141	140.156	154.172	168.188	182.203	196.219	210.235	224.25	238.266	252.282
OAD18	Ester-bond side	OAD15 + H2O	0.1	72.0575	86.0732	100.089	114.104	128.12	142.136	156.151	170.167	184.183	198.198	212.214	226.23	240.245	254.261	268.277
OAD19	Ester-bond side	OAD16 + H2O	0.2	73.0653	87.081	101.097	115.112	129.128	143.144	157.159	171.175	185.191	199.206	213.222	227.237	241.253	255.269	269.284
OAD20	Ester-bond side	OAD17 + H2O	0.01	74.0732	88.0888	102.104	116.12	130.136	144.151	158.167	172.183	186.198	200.214	214.23	228.245	242.261	256.277	270.292

## Sheet: TableS03
Fatty acid standards utilized in HEK experiment
Name	Structure
Alpha-linoleic acid (aLA)	FA 18:3(9Z, 12Z, 15Z)
Gamma-linoleic acid (gLA)	FA 18:3(6Z, 9Z, 12Z)
Eicosatetraenoic acid (ETA)	FA 20:4(8Z, 11Z, 14Z, 17Z)
Arachidonic acid (ARA)	FA 20:4(5Z, 8Z, 11Z, 14Z)
Docosapentaenoic acid (DPA)	FA 22:5(7Z, 10Z, 13Z, 16Z, 19Z)
Osbond acid (OsA)	FA 22:5(4Z, 7Z, 10Z, 13Z, 16Z)
Eicosapentaenoic acid (EPA)	FA 20:5(5Z, 8Z, 11Z, 14Z, 17Z)
Docosahexaenoic acid (DHA)	FA 22:6(4Z, 7Z, 10Z, 13Z, 16Z, 19Z)

## Sheet: TableS04
Information of HEK samples
Sample	Sample condition	Cell count
HEK01_Blank	Blank	0
HEK02_Control	Incubated without additional PUFA	12.10×106
HEK03_aLA	Incubated in 10 mM of aLA	7.50×106
HEK04_gLA	Incubated in 10 mM of gLA	5.80×106
HEK05_aLA+gLA	Incubated in 5 mM of aLA and gLA	8.90×106
HEK06_aLA&gLA Mix	Equivalent mixture of HEK03&HEK04	(7.50+5.80)/2×106
HEK07_ETA	Incubated in 10 mM of ETA	8.40×106
HEK08_ARA	Incubated in 10 mM of ARA	10.55×106
HEK09_ETA+ARA	Incubated in 5 mM of ETA and ARA	6.65×106
HEK10_ETA&ARA Mix	Equivalent mixture of HEK07&HEK08	(8.40+10.55)/2×106
HEK11_DPA	Incubated in 10 mM of DPA	6.95×106
HEK12_OsA	Incubated in 10 mM of OsA	5.35×106
HEK13_DPA+OsA	Incubated in 5 mM of DPA and OsA	5.05×106
HEK14_DPA&OsA Mix	Equivalent mixture of HEK11&HEK12	(6.95+5.35)/2×106
HEK15_EPA	Incubated in 10 mM of EPA	8.95×106
HEK16_DHA	Incubated in 10 mM of DHA	7.10×106
HEK17_ARA+EPA	Incubated in 5 mM of ARA and EPA	7.85×106
HEK18_ARA+DHA	Incubated in 5 mM of ARA and DHA	7.25×106

## Sheet: TableS05
Reference neutral loss values of PUFAs
Acyls	C=C position	OAD Type	Mass	Tolerance (Da)	Ion abundance (%)	Search type
aLA	n-3	OAD03	13.0442	0.01	0.01	NeutralLoss
		OAD16	55.0548	0.01	0.01	NeutralLoss
	n-6	OAD03	53.0755	0.01	0.01	NeutralLoss
		OAD16	95.0861	0.01	0.01	NeutralLoss
	n-9	OAD03	93.1068	0.01	0.01	NeutralLoss
		OAD16	135.117	0.01	0.01	NeutralLoss
gLA	n-6	OAD03	55.0912	0.01	0.01	NeutralLoss
		OAD16	97.1017	0.01	0.01	NeutralLoss
	n-9	OAD03	95.1225	0.01	0.01	NeutralLoss
		OAD16	137.133	0.01	0.01	NeutralLoss
	n-12	OAD03	135.154	0.01	0.01	NeutralLoss
		OAD16	177.164	0.01	0.01	NeutralLoss
ETA	n-3	OAD03	13.0442	0.01	0.01	NeutralLoss
		OAD16	55.0548	0.01	0.01	NeutralLoss
	n-6	OAD03	53.0755	0.01	0.01	NeutralLoss
		OAD16	95.0861	0.01	0.01	NeutralLoss
	n-9	OAD03	93.1068	0.01	0.01	NeutralLoss
		OAD16	135.117	0.01	0.01	NeutralLoss
	n-12	OAD03	133.138	0.01	0.01	NeutralLoss
		OAD16	175.149	0.01	0.01	NeutralLoss
ARA	n-6	OAD03	55.0912	0.01	0.01	NeutralLoss
		OAD16	97.1017	0.01	0.01	NeutralLoss
	n-9	OAD03	95.1225	0.01	0.01	NeutralLoss
		OAD16	137.133	0.01	0.01	NeutralLoss
	n-12	OAD03	135.154	0.01	0.01	NeutralLoss
		OAD16	177.164	0.01	0.01	NeutralLoss
	n-15	OAD03	175.185	0.01	0.01	NeutralLoss
		OAD16	217.196	0.01	0.01	NeutralLoss
EPA, DPA	n-3	OAD03	13.0442	0.01	0.01	NeutralLoss
		OAD16	55.0548	0.01	0.01	NeutralLoss
	n-6	OAD03	53.0755	0.01	0.01	NeutralLoss
		OAD16	95.0861	0.01	0.01	NeutralLoss
	n-9	OAD03	93.1068	0.01	0.01	NeutralLoss
		OAD16	135.117	0.01	0.01	NeutralLoss
	n-12	OAD03	133.138	0.01	0.01	NeutralLoss
		OAD16	175.149	0.01	0.01	NeutralLoss
	n-15	OAD03	173.169	0.01	0.01	NeutralLoss
		OAD16	215.18	0.01	0.01	NeutralLoss
OsbA	n-6	OAD03	55.0912	0.01	0.01	NeutralLoss
		OAD16	97.1017	0.01	0.01	NeutralLoss
	n-9	OAD03	95.1225	0.01	0.01	NeutralLoss
		OAD16	137.133	0.01	0.01	NeutralLoss
	n-12	OAD03	135.154	0.01	0.01	NeutralLoss
		OAD16	177.164	0.01	0.01	NeutralLoss
	n-15	OAD03	175.185	0.01	0.01	NeutralLoss
		OAD16	217.196	0.01	0.01	NeutralLoss
	n-18	OAD03	215.216	0.01	0.01	NeutralLoss
		OAD16	257.227	0.01	0.01	NeutralLoss
DHA	n-3	OAD03	13.0442	0.01	0.01	NeutralLoss
		OAD16	55.0548	0.01	0.01	NeutralLoss
	n-6	OAD03	53.0755	0.01	0.01	NeutralLoss
		OAD16	95.0861	0.01	0.01	NeutralLoss
	n-9	OAD03	93.1068	0.01	0.01	NeutralLoss
		OAD16	135.117	0.01	0.01	NeutralLoss
	n-12	OAD03	133.138	0.01	0.01	NeutralLoss
		OAD16	175.149	0.01	0.01	NeutralLoss
	n-15	OAD03	173.169	0.01	0.01	NeutralLoss
		OAD16	215.18	0.01	0.01	NeutralLoss
	n-18	OAD03	213.201	0.01	0.01	NeutralLoss
		OAD16	255.211	0.01	0.01	NeutralLoss

## Sheet: TableS06
Annotation result of biological samples
		CID Pos(+)	CID Neg(-)	Only saturated	C=C solved by OAD
	Brain	339	309	66	135
	Eye	324	207	50	164
	Liver	350	296	49	168
	Skin	384	357	72	202
	Testis	344	308	48	170
	Feces	310	342	105	60
	Human plasma	282	142	38	109
	Total C=C solved molecules : 1008 (22 lipid subclasses) including 675 unique lipids

## Sheet: TableS07
Lipid extraction of HEK293 cells
											Injection volume (mL)
No.	Sample name	Extraction MeOH mL	cell count	transfer vol.	I.S. MeOH Mix	add. I. S. Vol.(mL)	add. MeOH	add. CHCl3	add. H2O	Total Vol.	CID(+)	CID(-)	OAD
1	HEK_Blank	340	0	340	1mM FA 16:0d3 6.4 mL 1mM FA 18:0d3 6.4 mL 160uM FA 20:4d11 20 mL equiSPLASH 10 mL per 1 sample -> 6.4+6.4+20+10+17.2(MeOH) = 60 mL I.S. / 640 mL Total 108.8+108.8+340+170+292.4 = 1020 mL	60	0	200	40	640 mL	1	1	3
2	HEK_Control	340	12.1×106 cells	340		60	0	200	40	640 mL	1	1	3
3	HEK_aLA_18:3n-3	340	7.50×106 cells	340		60	0	200	40	640 mL	1	1	3
4	HEK_gLA_18:3n-6	340	5.80×106 cells	340		60	0	200	40	640 mL	1	1	3
5	HEK_ETA_20:4n-3	340	8.70×106 cells	340		60	0	200	40	640 mL	1	1	3
6	HEK_ARA_20:4n-6	340	10.1×106 cells	340		60	0	200	40	640 mL	1	1	3
7	HEK_EPA_20:5n-3	340	8.95×106 cells	340		60	0	200	40	640 mL	1	1	3
8	HEK_DHA_22:6n-3	340	7.10×106 cells	340		60	0	200	40	640 mL	1	1	3
9	HEK_DPA_22:5n-3	340	6.95×106 cells	340		60	0	200	40	640 mL	1	1	3
10	HEK_OsbA_22:5n-6	340	5.35×106 cells	340		60	0	200	40	640 mL	1	1	3
11	HEK_aLA+gLA	340	8.90×106 cells	340		60	0	200	40	640 mL	1	1	3
12	HEK_ETA+ARA	340	6.65×106 cells	340		60	0	200	40	640 mL	1	1	3
13	HEK_ARA+EPA	340	7.85×106 cells	340		60	0	200	40	640 mL	1	1	3
14	HEK_ARA+DHA	340	7.25×106 cells	340		60	0	200	40	640 mL	1	1	3
15	HEK_DPA+Osbond	340	5.05×106 cells	340		60	0	200	40	640 mL	1	1	3

## Sheet: TableS08
Lipid extraction of biological tissues
													Injection volume (mL)
No.	Sample name	Extraction MeOH mL	weight(mg)	transfer mg	transfer vol.	I.S. MeOH Mix	I.S. Vol.(mL)	add. MeOH	add. CHCl3	add. H2O	Total Vol.	mg/mL	CID(+)	CID(-)	OAD
1	Blank	600	0	0	380	10mM FA 16:0d3 1.28 mL 10mM FA 18:0d3 1.28 mL equiSPLASH 10 mL per 640 mL -> 1.28+1.28+10+7.44(MeOH) = 20 mL I.S. / 640 mL Total 25.6+25.6+200+148.8 = 400 mL	20	0	200	40	640 mL	0mg/400+200+40 mL	1	1	3
2	Brain_1	1000	221.1	60	271.37		20	108.63	200	40	640 mL	60mg/400+200+40 mL	1	1	3
3	Brain_2	1000	242.5	60	247.423		20	132.577	200	40	640 mL	60mg/400+200+40 mL	1	1	3
4	Brain_3	1000	205.8	60	291.545		20	88.4548	200	40	640 mL	60mg/400+200+40 mL	1	1	3
5	Liver_1	800	157.6	60	304.569		20	75.4315	200	40	640 mL	60mg/400+200+40 mL	1	1	3
6	Liver_2	800	160.7	60	298.693		20	81.3068	200	40	640 mL	60mg/400+200+40 mL	1	1	3
7	Liver_3	800	222.3	60	215.924		20	164.076	200	40	640 mL	60mg/400+200+40 mL	1	1	3
8	Testis_1	500	107.5	60	279.07		20	100.93	200	40	640 mL	60mg/400+200+40 mL	1	1	3
9	Testis_2	500	98.8	60	303.644		20	76.3563	200	40	640 mL	60mg/400+200+40 mL	1	1	3
10	Testis_3	500	86.6	60	346.42		20	33.5797	200	40	640 mL	60mg/400+200+40 mL	1	1	3
11	Skin_1	350	64.1	54	294.852		18	47.1482	180	36	576 mL	54mg/360+180+36 mL	1	1	3
12	Skin_2	350	63.8	54	296.238		18	45.7618	180	36	576 mL	54mg/360+180+36 mL	1	1	3
13	Skin_3	350	60.8	54	310.855		18	31.1447	180	36	576 mL	54mg/360+180+36 mL	1	1	3
14	Feces_1	360	77.3	54	251.488		18	90.5123	180	36	576 mL	54mg/360+180+36 mL	1	1	3
15	Feces_2	360	62.3	54	312.039		18	29.9615	180	36	576 mL	54mg/360+180+36 mL	1	1	3
16	Feces_3	360	70.6	54	275.354		18	66.6459	180	36	576 mL	54mg/360+180+36 mL	1	1	3
17	Eye_1	220	39.6	33	183.333		11	25.6667	110	22	352 mL	33mg/220+110+22 mL	1	1	3
18	Eye_2	220	35.2	33	206.25		11	2.75	110	22	352 mL	33mg/220+110+22 mL	1	1	3
19	Eye_3	220	38.6	33	188.083		11	20.9171	110	22	352 mL	33mg/220+110+22 mL	1	1	3
20	NIST Plasma	380	40 mL	40 mL	420		20	0	200	0	640 mL	40 mL/400+200+0 mL	1	1	3
