# Supplementary figures and images for: Computational mass spectrometry accelerates C=C position-resolved untargeted lipidomics using oxygen attachment dissociation
Source: Research Square preprint supplement (doi:10.21203/rs.3.rs-727852/v1), 2021-07-26

# (a) Phospholipids

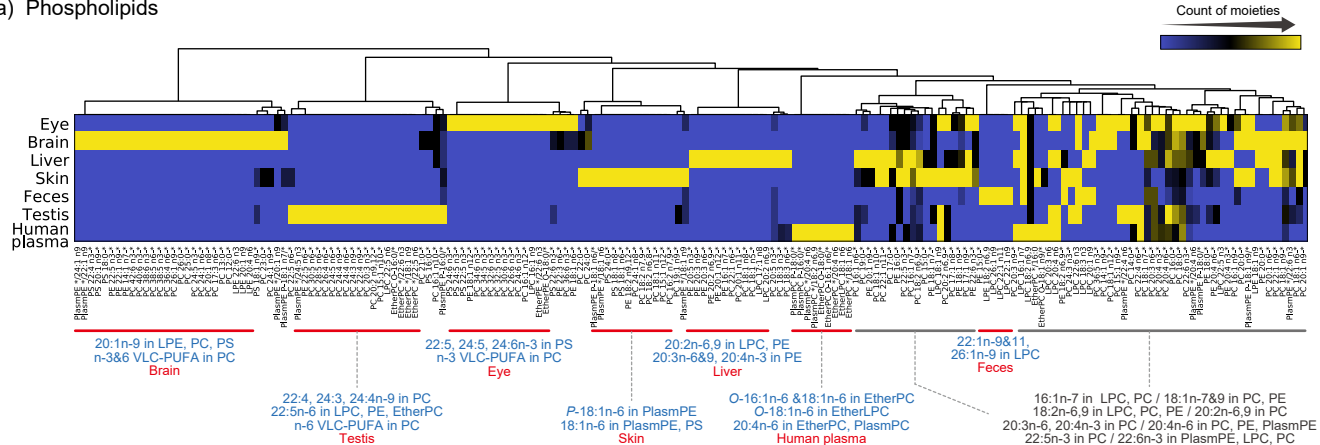

# (b) Sphingolipids, Glycerolipids and Fatty acyls

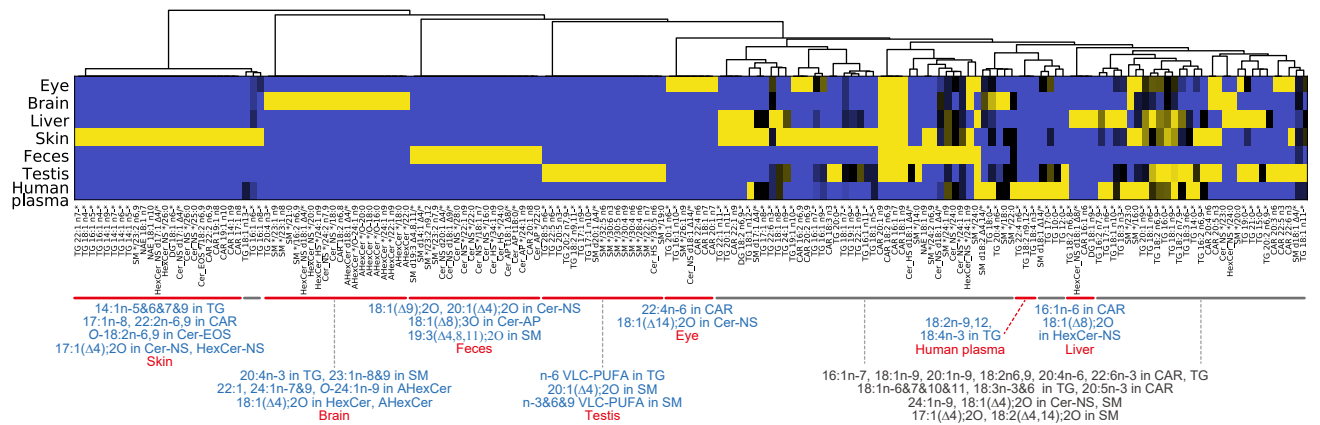

Supplement: Supplementary file 1 [file 713721c04d074c94d09bbe7a.pdf]
